# Supplementary material for: An old reaction in new media: kinetic study of a platinum(II) substitution reaction in ionic liquids
Source: Royal Society of Chemistry journal article supplement (doi:10.1039/b822152a), 2009-01-01
Supplement: b822152a.pdf [file b822152a.pdf]

# An old reaction in new media: Kinetic study of a Platinum(II) substitution reaction in ionic liquids

## Supplementary Information

Isabel Correia<sup>a,b</sup> and Tom Welton<sup>a</sup>

<sup>a</sup> Department of Chemistry, Imperial College London, South Kensington Campus, London SW7 2AZ, United Kingdom

<sup>b</sup> currently at Centro de Química Estrutural, Instituto Superior Técnico, Av. Rovisco Pais, 1049-001 Lisbon, Portugal

### Characterization of the ionic liquids

**[C<sub>4</sub>C<sub>1</sub>im][NTf<sub>2</sub>]** – The ionic liquid was prepared according to a literature procedure.<sup>17</sup>

$\delta_{\text{H}}$ : (400 MHz, DMSO-*d*<sub>6</sub>)/ppm 8.78 (1H, s, N<sub>2</sub>CH), 7.40 and 7.35 (2H, m, 2NCH), 4.20 (2H, t, NCH<sub>2</sub>(CH<sub>2</sub>)<sub>2</sub>CH<sub>3</sub>), 3.86 (3H, s, NCH<sub>3</sub>), 1.88 (2H, quintet, NCH<sub>2</sub>CH<sub>2</sub>CH<sub>2</sub>CH<sub>3</sub>), 1.35 (2H, sextet, NCH<sub>2</sub>CH<sub>2</sub>CH<sub>2</sub>CH<sub>3</sub>) and 0.95 (3H, t, N(CH<sub>2</sub>)<sub>3</sub>CH<sub>3</sub>)

*m/z* (FAB+): 558 ([C<sub>4</sub>C<sub>1</sub>im)<sub>2</sub>N(SO<sub>2</sub>CF<sub>3</sub>)<sub>2</sub>]<sup>+</sup>, 45%) and 139 ([C<sub>4</sub>C<sub>1</sub>im]<sup>+</sup>, 100%)

*m/z* (FAB–): 280 ([N(SO<sub>2</sub>CF<sub>3</sub>)<sub>2</sub>]<sup>–</sup>, 100%).

**[C<sub>4</sub>C<sub>1</sub>py][NTf<sub>2</sub>]** – The ionic liquid was prepared according to a literature procedure.<sup>17</sup>

$\delta_{\text{H}}$ : (400 MHz, DMSO-*d*<sub>6</sub>)/ppm 3.56–3.36 (4H, m, N(CH<sub>2</sub>)<sub>2</sub>), 3.34–3.24 (2H, m, NCH<sub>2</sub>(CH<sub>2</sub>)CH<sub>3</sub>), 2.99 (3H, s, NCH<sub>3</sub>), 2.10 (4H, br. s, NCH<sub>2</sub>(CH<sub>2</sub>)<sub>2</sub>CH<sub>3</sub>), 1.70 (2H, m, NCH<sub>2</sub>CH<sub>2</sub>CH<sub>2</sub>CH<sub>3</sub>), 1.33 (2H, sextet, N(CH<sub>2</sub>)<sub>2</sub>CH<sub>2</sub>CH<sub>3</sub>) and 0.94 (3H, t, N(CH<sub>2</sub>)<sub>3</sub>CH<sub>3</sub>)

*m/z* (FAB+): 564 ([C<sub>4</sub>C<sub>1</sub>py)<sub>2</sub>N(SO<sub>2</sub>CF<sub>3</sub>)<sub>2</sub>]<sup>+</sup>, 30%) and 142 ([C<sub>4</sub>C<sub>1</sub>py]<sup>+</sup>, 100%)

*m/z* (FAB–): 280 ([N(SO<sub>2</sub>CF<sub>3</sub>)<sub>2</sub>]<sup>–</sup>, 100%).

**[C<sub>4</sub>C<sub>1</sub>py][OTf]** – The ionic liquid was prepared according to a literature procedure.<sup>17</sup>

$\delta_{\text{H}}$ : (400 MHz, DMSO-*d*<sub>6</sub>)/ppm 3.55–3.35 (4H, m, N(CH<sub>2</sub>)<sub>2</sub>), 3.33–3.23 (2H, m, NCH<sub>2</sub>(CH<sub>2</sub>)CH<sub>3</sub>), 2.97 (3H, s, NCH<sub>3</sub>), 2.0 (4H, br. s, NCH<sub>2</sub>(CH<sub>2</sub>)<sub>2</sub>CH<sub>3</sub>), 1.70 (2H, m, NCH<sub>2</sub>CH<sub>2</sub>CH<sub>2</sub>CH<sub>3</sub>), 1.30 (2H, sextet, N(CH<sub>2</sub>)<sub>2</sub>CH<sub>2</sub>CH<sub>3</sub>) and 0.94 (3H, t, N(CH<sub>2</sub>)<sub>3</sub>CH<sub>3</sub>)

*m/z* (FAB+): 433 ([C<sub>4</sub>C<sub>1</sub>py)<sub>2</sub>(CF<sub>3</sub>SO<sub>3</sub>)<sub>2</sub>]<sup>+</sup>, 5%) and 142 ([C<sub>4</sub>C<sub>1</sub>py]<sup>+</sup>, 100%)

*m/z* (FAB–): 440 ([C<sub>4</sub>C<sub>1</sub>py)(CF<sub>3</sub>SO<sub>3</sub>)<sub>2</sub>]<sup>–</sup>, 5%) 149 [(CF<sub>3</sub>SO<sub>3</sub>)<sup>–</sup>, 100%].

**[(C<sub>1</sub>OC<sub>2</sub>)C<sub>1</sub>im][NTf<sub>2</sub>]** – The ionic liquid was donated by a colleague.

$\delta_{\text{H}}$ : (400 MHz, DMSO-*d*<sub>6</sub>)/ppm 9.10 (1H, s, N<sub>2</sub>CH), 7.75 (2H, m, 2NCH), 4.35 (2H, t, NCH<sub>2</sub>CH<sub>2</sub>OCH<sub>3</sub>), 3.87 (3H, s, NCH<sub>3</sub>), 3.65 (2H, t, NCH<sub>2</sub>CH<sub>2</sub>OCH<sub>3</sub>), 3.35 (3H, s, OCH<sub>3</sub>) and 2.50 (2H, t, NCH<sub>2</sub>CH<sub>2</sub>O)

m/z (FAB+): 562 ({[(C<sub>3</sub>OC<sub>1</sub>)C<sub>1</sub>im]<sub>2</sub>[N(SO<sub>2</sub>CF<sub>3</sub>)<sub>2</sub>]}<sup>+</sup>, 15%) 282 {[[(C<sub>3</sub>OC<sub>1</sub>)C<sub>1</sub>im]<sub>2</sub>}<sup>2+</sup>, 10%) and 139 ([C<sub>4</sub>C<sub>1</sub>im]<sup>+</sup>, 100)

m/z (FAB–): 280 ([N(SO<sub>2</sub>CF<sub>3</sub>)<sub>2</sub>]<sup>–</sup>, 100%).

## Kinetic studies

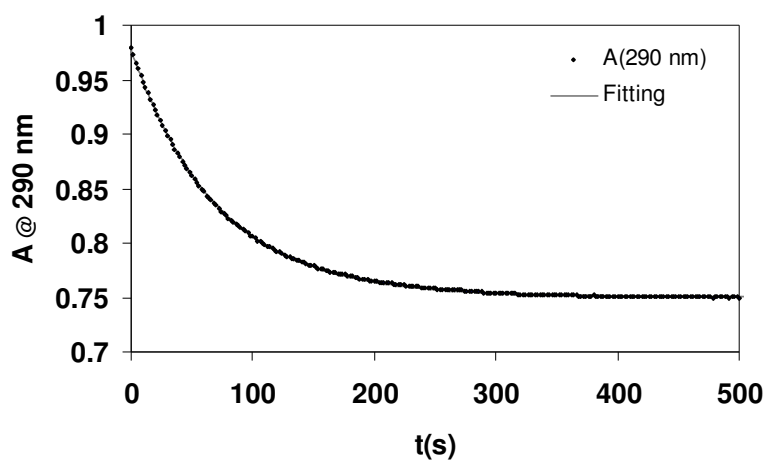

Kinetic trace of the reaction  $[\text{Pt}(\text{dpma})\text{Cl}]^+ + \text{SAc}^- \rightleftharpoons [\text{Pt}(\text{dpma})\text{SAc}]^+ + \text{Cl}^-$  in  $[\text{C}_4\text{C}_1\text{py}][\text{NTf}_2]$  at 25 °C. Concentrations of  $[\text{Pt}(\text{dpma})\text{Cl}]^+ = 0.99 \times 10^{-3} \text{ M}$  and  $\text{KSAc} = 39.0 \times 10^{-4} \text{ M}$ .

Plots of  $k_{\text{obs}} (\text{s}^{-1})$  vs.  $[\text{SAc}^-] (\text{M})$  for  $[\text{Pt}(\text{bpma})\text{Cl}]^+ \sim 1 \times 10^{-4} \text{ M}$  at 25 °C

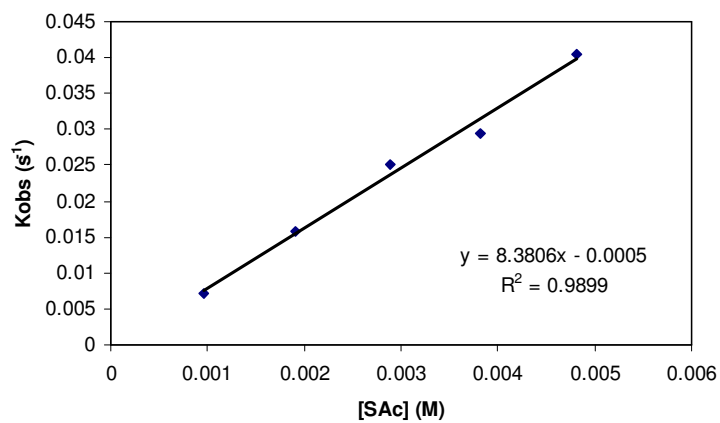

Fig S1 – In  $[\text{C}_4\text{C}_1\text{im}][\text{NTf}_2]$

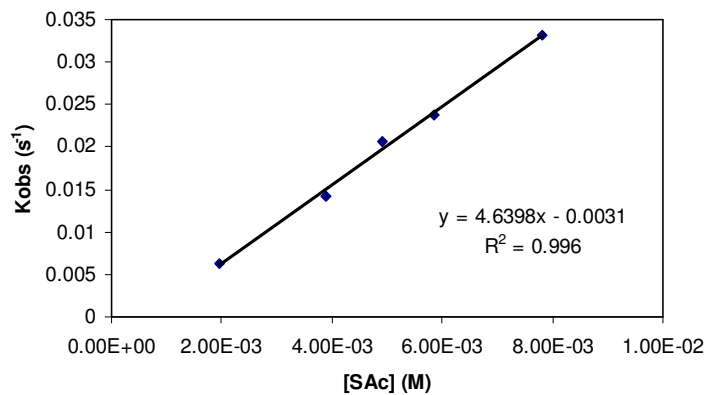

Fig S2 – In  $[C_4C_1py][NTf_2]$

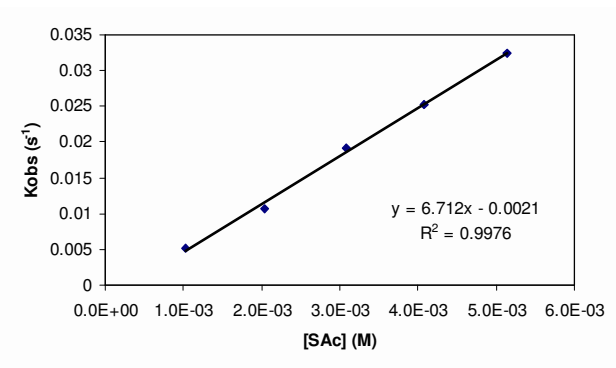

Fig S3 – In  $[C_4C_1py][OTf]$

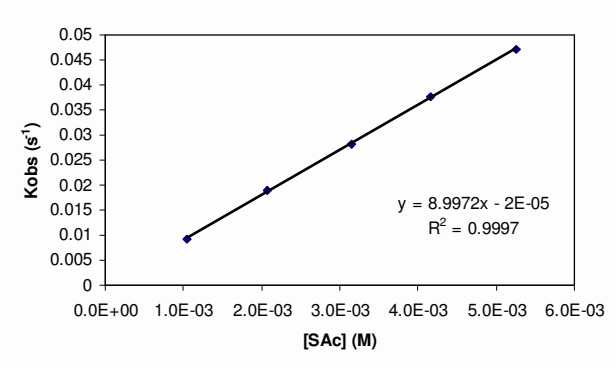

Fig S4 – In  $[(C_1OC_2)C_1im][NTf_2]$

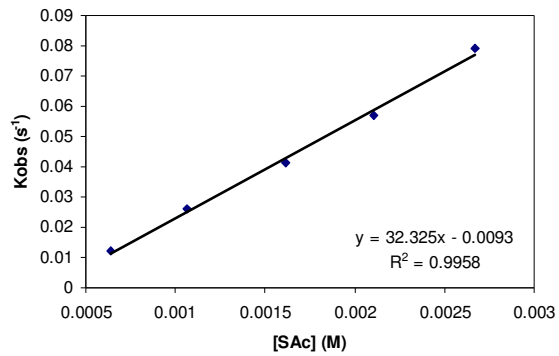

Fig S5 – In  $H_2O$

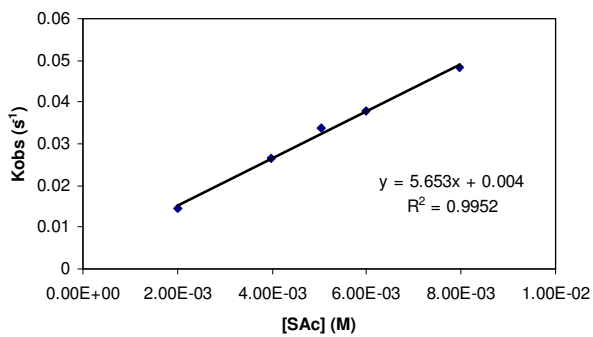

Fig S6 – In DMSO

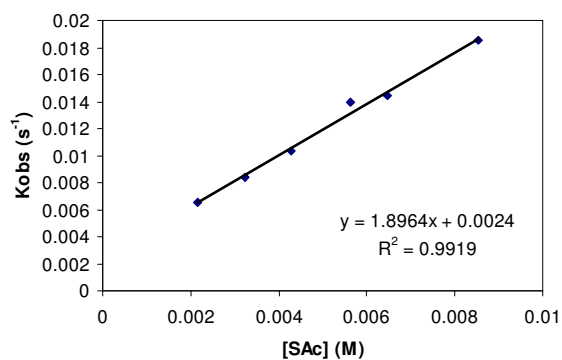

Fig S7 – In MeOH

## Eyring Plots

Plots of  $\ln(k_{\text{obs}}/T)$  vs.  $1/T$  for  $[\text{Pt}(\text{bpma})\text{Cl}]^+ \sim 1 \times 10^{-4} \text{ M}$ :

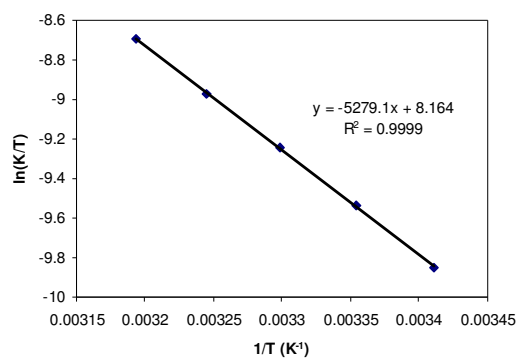

Fig S8 –  $\ln [C_4C_1\text{im}][\text{NTf}_2]$ ;  $[\text{Pt}] = 9.00 \times 10^{-5} \text{ M}$  and  $[\text{SAc}] = 2.89 \times 10^{-3} \text{ M}$

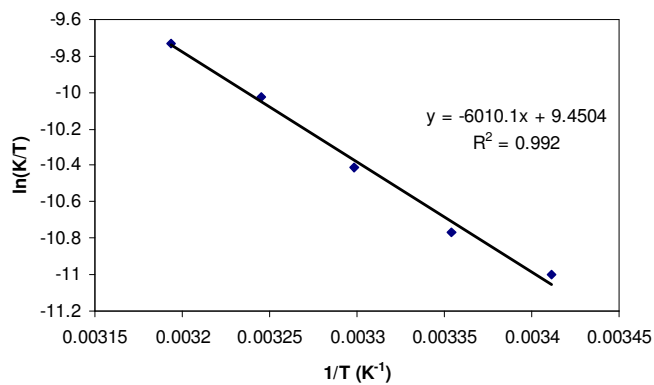

Fig S9 –  $\ln [C_4C_1\text{py}][\text{NTf}_2]$ ;  $[\text{Pt}] = 9.90 \times 10^{-5} \text{ M}$  and  $[\text{SAc}] = 1.95 \times 10^{-3} \text{ M}$

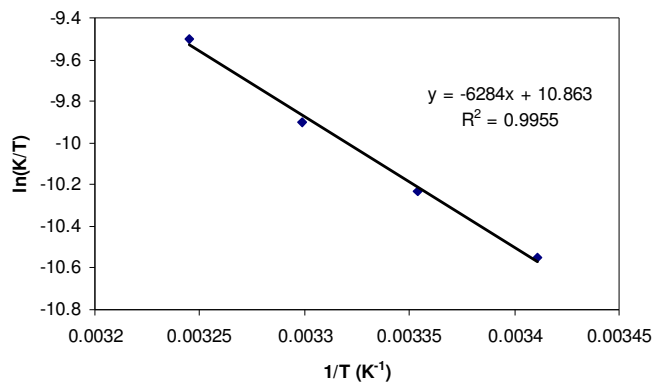

Fig S10 –  $\ln [C_4C_1py][OTf]$ ;  $[Pt]=1.09 \times 10^{-4} \text{M}$  and  $[SAC]=2.04 \times 10^{-3} \text{M}$

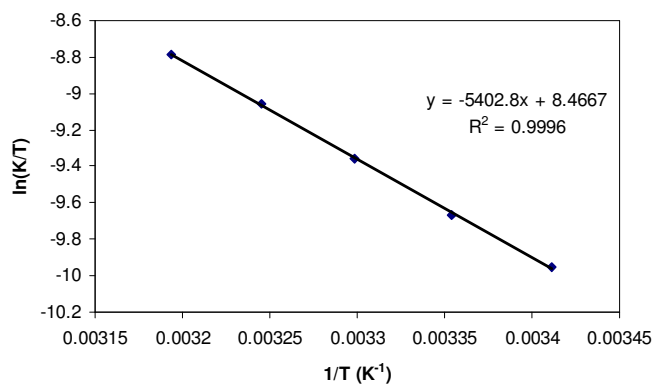

Fig S11 –  $\ln [(C_1OC_2)C_1im][NTf_2]$ ;  $[Pt]=1.04 \times 10^{-4} \text{M}$  and  $[SAC]=2.08 \times 10^{-3} \text{M}$

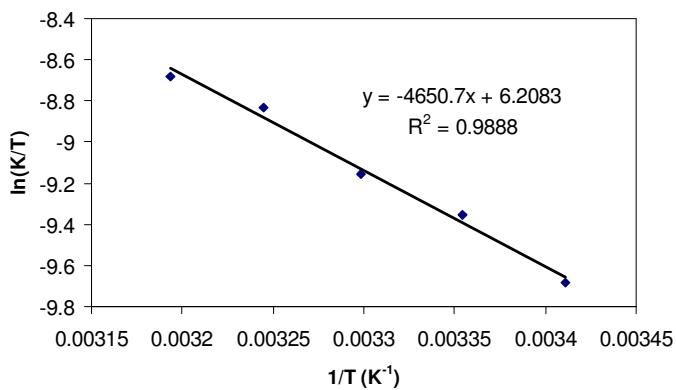

Fig S12 –  $\ln H_2O$ ;  $[Pt]=3.96 \times 10^{-5} \text{M}$  and  $[SAC]=1.06 \times 10^{-3} \text{M}$

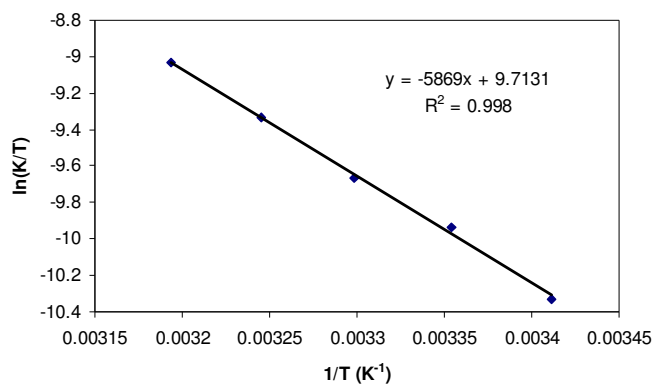

Fig S13 – In DMSO; [Pt]= $8.916 \times 10^{-5}$ M and [SAC]= $1.99 \times 10^{-3}$ M

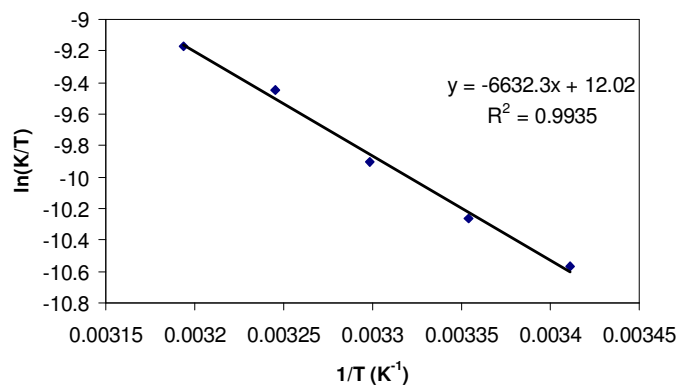

Fig S14 – In MeOH; [Pt]= $8.986 \times 10^{-5}$ M and [SAC]= $4.27 \times 10^{-3}$ M



**Table S1 – k<sub>obs</sub> at various temperatures-**

| <b>Solvent</b>                                                          | <b>T (°C)</b> | <b>K<sub>obs</sub> (×10<sup>2</sup>) / s<sup>-1</sup></b> |
|-------------------------------------------------------------------------|---------------|-----------------------------------------------------------|
| MeOH                                                                    | 20            | 0.755                                                     |
| [SAc] = 4.27 ×10 <sup>-3</sup> M                                        | 25            | 1.04                                                      |
| [Pt] = 8,98 ×10 <sup>-5</sup> M                                         | 30            | 1.51                                                      |
|                                                                         | 35            | 2.43                                                      |
|                                                                         | 40            | 3.26                                                      |
| H <sub>2</sub> O                                                        | 20            | 1.82                                                      |
| [SAc] = 1.06 ×10 <sup>-3</sup> M                                        | 25            | 2.59                                                      |
| [Pt] = 3.96 ×10 <sup>-5</sup> M                                         | 30            | 3.20                                                      |
|                                                                         | 35            | 4.51                                                      |
|                                                                         | 40            | 5.31                                                      |
| DMSO                                                                    | 20            | 0.959                                                     |
| [SAc] = 1.99 ×10 <sup>-3</sup> M                                        | 25            | 1.45                                                      |
| [Pt] = 8.91 ×10 <sup>-5</sup> M                                         | 30            | 1.93                                                      |
|                                                                         | 35            | 2.72                                                      |
|                                                                         | 40            | 3.75                                                      |
| [(C <sub>1</sub> OC <sub>2</sub> )C <sub>1</sub> im][NTf <sub>2</sub> ] | 20            | 1.39                                                      |
| [SAc] = 2.08×10 <sup>-3</sup> M                                         | 25            | 1.89                                                      |
| [Pt] = 1.04 ×10 <sup>-4</sup> M                                         | 30            | 2.62                                                      |
|                                                                         | 35            | 3.59                                                      |
|                                                                         | 40            | 4.78                                                      |
| [C <sub>4</sub> C <sub>1</sub> im][NTf <sub>2</sub> ]                   | 20            | 1.55                                                      |
| [SAc]=2.89 ×10 <sup>-3</sup> M                                          | 25            | 2.15                                                      |
| [Pt]=9.00×10 <sup>-5</sup> M                                            | 30            | 2.93                                                      |
|                                                                         | 35            | 3.91                                                      |
|                                                                         | 40            | 5.25                                                      |
| [C <sub>4</sub> C <sub>1</sub> py][NTf <sub>2</sub> ]                   | 20            | 0.491                                                     |
| [SAc]=1.95 ×10 <sup>-3</sup> M                                          | 25            | 0.630                                                     |
| [Pt]=9.90 ×10 <sup>-5</sup> M                                           | 30            | 0.910                                                     |
|                                                                         | 35            | 1.36                                                      |
|                                                                         | 40            | 1.87                                                      |
| [C <sub>4</sub> C <sub>1</sub> py][OTf]                                 | 20            | 0.767                                                     |
| [SAc]=2.04 ×10 <sup>-3</sup> M                                          | 25            | 1.07                                                      |
| Pt]=1.09 ×10 <sup>-4</sup> M                                            | 30            | 1.52                                                      |
|                                                                         | 35            | 2.30                                                      |
